# Supplementary material
Source: Springer Nature journal article supplement (https://www.springermedizin.de/resource/supplementary/13017_2010_173_MOESM3_ESM.pdf/9635626)

11:50:38.10  
3 IMA 64  
SPI 3  
SP -319.0

R

kV 130  
eff.mAs 86  
ref.mAs 100  
TI 0.6  
GT 0.0  
SL 5.0/2.0/9.8  
360-12/10  
B41s L3C0.A

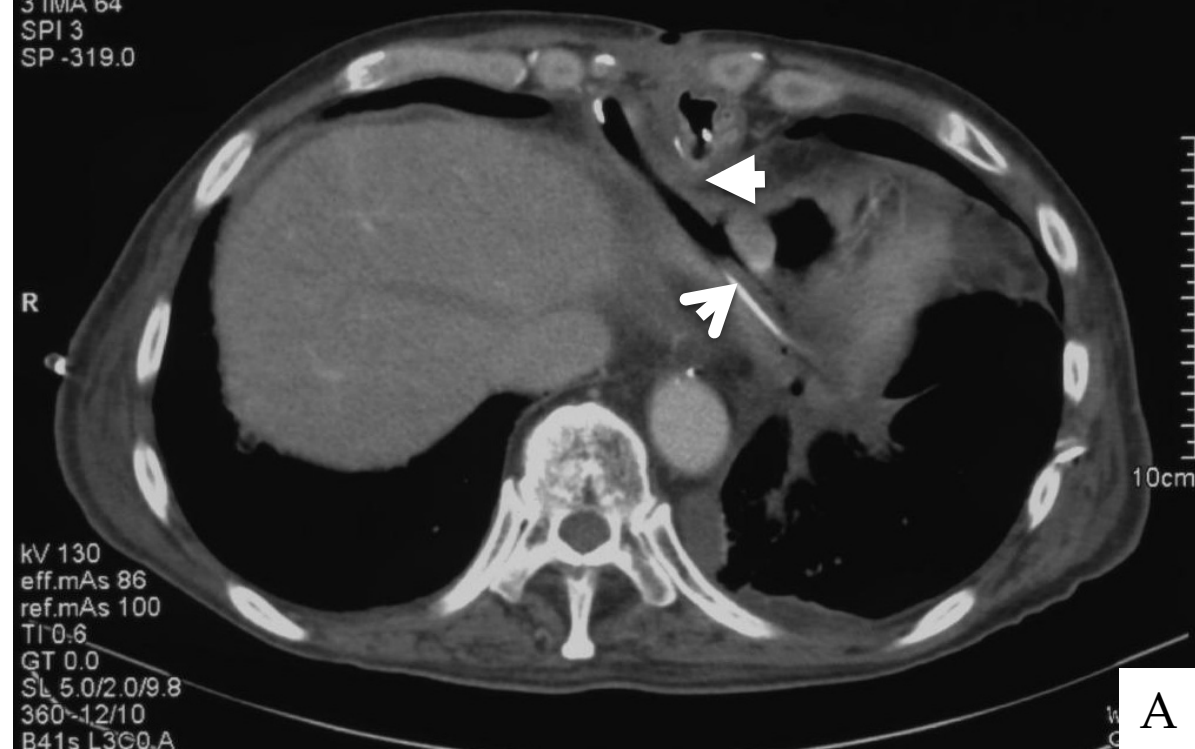

A

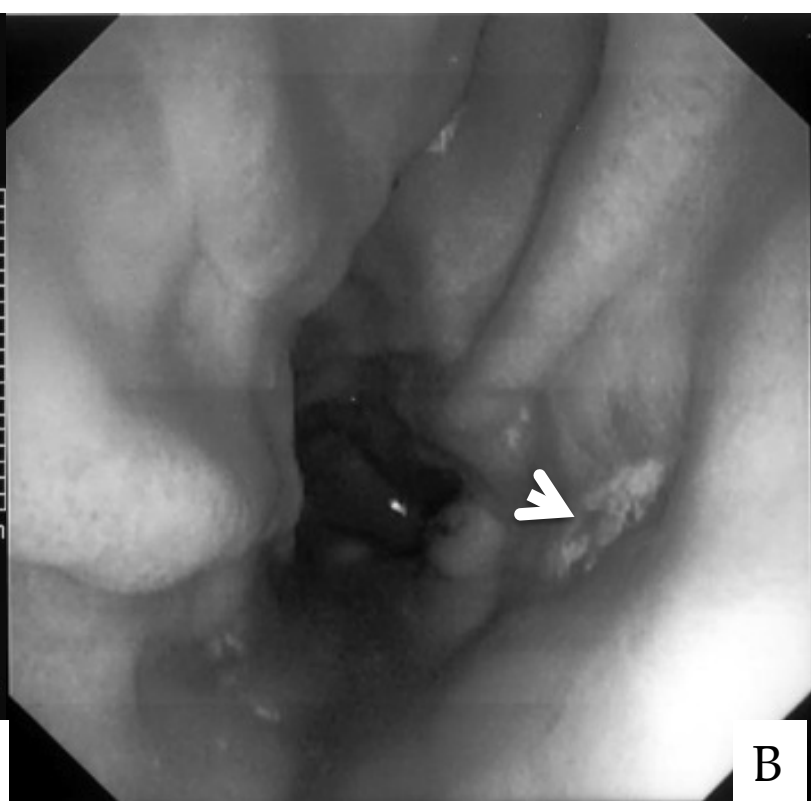

B

Supplement: MOESM3 [file 9635626]
